# Supplementary material for: Integration of isoelectric focusing with multi-channel gel electrophoresis by using microfluidic pseudo-valves
Source: Royal Society of Chemistry journal article supplement (doi:10.1039/b712794d), 2007-01-01
Supplement: b712794d.doc [file b712794d.doc]

Supplementary Material (ESI) for Lab on a Chip

This journal is © The Royal Society of Chemistry 2007

**Electronic Supplementary Information**

**Integration of Isoelectric Focusing with Multi-channel Gel Electrophoresis**

**by Using Microfluidic Pseudo-Valves**

Champak Das1,#, Jiyou Zhang1,§, Nancy D. Denslow2, Z. Hugh Fan1,3,*

1Department of Mechanical and Aerospace Engineering, 2Department of Physiological Sciences, 3Department of Biomedical Engineering, University of Florida, P.O. Box 116250, Gainesville, FL 32611, USA

Isoelectric focusing (IEF) is performed in the device when microfluidic pseudo-valves are in place. **Supplementary Figure 1** shows the image of four focused proteins in the IEF channel, including fluorescently-labeled paralbumin, ovalbumin, and BSA, and naturally fluorescent GFP. All of them are well-focused and separated, except for BSA and ovalbumin because of their similarity in pI.

**Supplementary Figure 1. (a)** IEF of BSA, ovalbumin, paralbumin, and GFP in the 2D electrophoresis device. A voltage of 300 V is applied to the IEF channel in the presence of gel pseudo-valves. Lines are added to show the channel locations. **(b)** The corresponding electropherogram of (a). Peaks of proteins are indicated. Each pixel in x axis approximately corresponds to ~20 µm.
